# Supplementary material for: Development and fluctuation of crystal orientation fabric in the deep sections of the Dome Fuji ice core, Antarctica: impacts of dust particles and migration recrystallization
Source: Copernicus journal article supplement (doi:10.5194/tc-19-2365-2025), 2025-07-03
Supplement: Supplementary file 2 [file tc-19-2365-2025-supplement.zip]

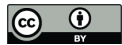

## *Supplement of*

# **Development and fluctuation of crystal orientation fabric in the deep sections of the Dome Fuji ice core, Antarctica: impacts of dust particles and migration recrystallization**

**Tomotaka Saruya et al.**

*Correspondence to:* Tomotaka Saruya (saruya.tomotaka@nipr.ac.jp), Atsushi Miyamoto (miyamoto@high.hokudai.ac.jp), and Shuji Fujita (sfujita@nipr.ac.jp)

- tc-19-2365-2025-supplement-title-page.pdf
- supplemental\_1-3\_egusphere-2023-3146.pdf
- supplemental\_4\_egusphere-2023-3146.pdf

The copyright of individual parts of the supplement might differ from the article licence.
